# Supplementary material for: Adverse Impact of Heavy Metals on Bone Cells and Bone Metabolism Dependently and Independently through Anemia
Source: PubMed Central journal article supplement (PMC7539179; doi:10.1002/advs.202000383), 2020-08-04
Supplement: ADVS-7-2000383-s001.pdf [file ADVS-7-2000383-s001.pdf]

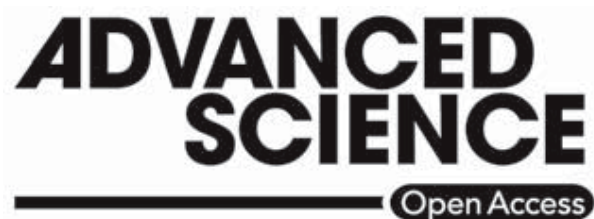

## Supporting Information

for *Adv. Sci.*, DOI: 10.1002/advs.202000383

**Adverse Impact of Heavy Metals on Bone Cells and Bone Metabolism Dependently and Independently through Anemia**

*Shuping Zhang, Li Sun, Jie Zhang, Sijin Liu, Jinxiang Han,\* and Yajun Liu\**

**Supplementary Table 1. Sources and exposure routes of heavy metals.**

|    | <b>Sources</b>                                                                 | <b>Human exposure routes</b>                                                  | <b>Refs</b> |
|----|--------------------------------------------------------------------------------|-------------------------------------------------------------------------------|-------------|
| Cd | Mining, smelting, fertilizers,<br>pigments, batteries, plastics,<br>pesticides | Occupational exposure, inhalation,<br>contaminated food and drinking<br>water | [1, 2]      |
| Pb | Mining, fossil fuel, pesticides,<br>pigments, cosmetics, fertilizers           | Occupational exposure,<br>contaminated food and drinking<br>water, smoking    | [1, 2]      |
| As | Mining, smelting, pesticides,<br>fertilizers, medical waste                    | Contaminated drinking water                                                   | [1, 3]      |
| Cr | Smelting, fossil fuel, tannery,<br>sewage, fertilizers, paper mill             | Occupational exposure,<br>contaminated water                                  | [1, 2]      |
| Hg | Mining, batteries, agriculture,<br>waste water                                 | Contaminated marine food and<br>water                                         | [1]         |

**Supplementary Table 2. Abbreviation list.**

| <b>Abbreviation</b> | <b>Full name</b>                            |
|---------------------|---------------------------------------------|
| MOAs                | Modes of action                             |
| AOPs                | Adverse outcome pathways                    |
| Ca                  | Calcium                                     |
| P                   | Phosphorus                                  |
| OPG                 | Osteoprotegerin                             |
| RANKL               | Receptor activator of NF- $\kappa$ B ligand |
| TRAP                | Tartrate-resistant acid phosphatase         |
| MMPs                | Matrix metalloproteinases                   |
| GAGs                | Glycosaminoglycans                          |
| PGs                 | Proteoglycans                               |
| ALP                 | Alkaline phosphatase                        |
| EPO                 | Erythropoietin                              |
| HSC                 | Hematopoietic stem cell                     |
| MSC                 | Mesenchymal stem cell                       |
| JAK2                | Janus kinase 2                              |
| PI3K                | Phosphoinositide 3-kinase                   |
| mTOR                | Mechanistic target of rapamycin             |

---

|              |                                           |
|--------------|-------------------------------------------|
| BMP2         | Bone morphogenetic protein 2              |
| RBC          | Red blood cell                            |
| ROS          | Reactive oxygen species                   |
| DMT-1        | Divalent metal transporter 1              |
| IGF-1        | Insulin-like growth factor 1              |
| BMPs         | Bone morphogenetic proteins               |
| VEGF         | Vascular endothelial growth factor        |
| IL-1         | Interleukin 1                             |
| IL-1 $\beta$ | Interleukin 1 $\beta$                     |
| IL-6         | Interleukin 6                             |
| IL-17        | Interleukin 17                            |
| TGF- $\beta$ | Transforming growth factor $\beta$        |
| TLR4         | Toll-like receptor 4                      |
| MAPK         | Mitogen-activated protein kinase          |
| Erk1/2       | Extracellular signal-regulated kinase 1/2 |

---

## References

1. M. Jaishankar, T. Tseten, N. Anbalagan, B. B. Mathew, K. N. Beeregowda, *Interdiscip Toxicol* 2014, **7**, 60.
2. S. Martin, W. Griswold, *Environ. Sci. Technol.* 2009, **15**, 1.
3. A. H. Smith, E. O. Lingas, M. Rahman, *Bull World Health Organ* 2000, **78**, 1093.
